# Supplementary material for: Transcriptomic Analysis Suggests a Coordinated Regulation of Carotenoid Metabolism in Ripening Chili Pepper (Capsicum annuum var. conoides) Fruits
Source: MDPI journal article supplement (doi:10.3390/antiox11112245), 2022-11-14
Supplement: s1 [file s1]

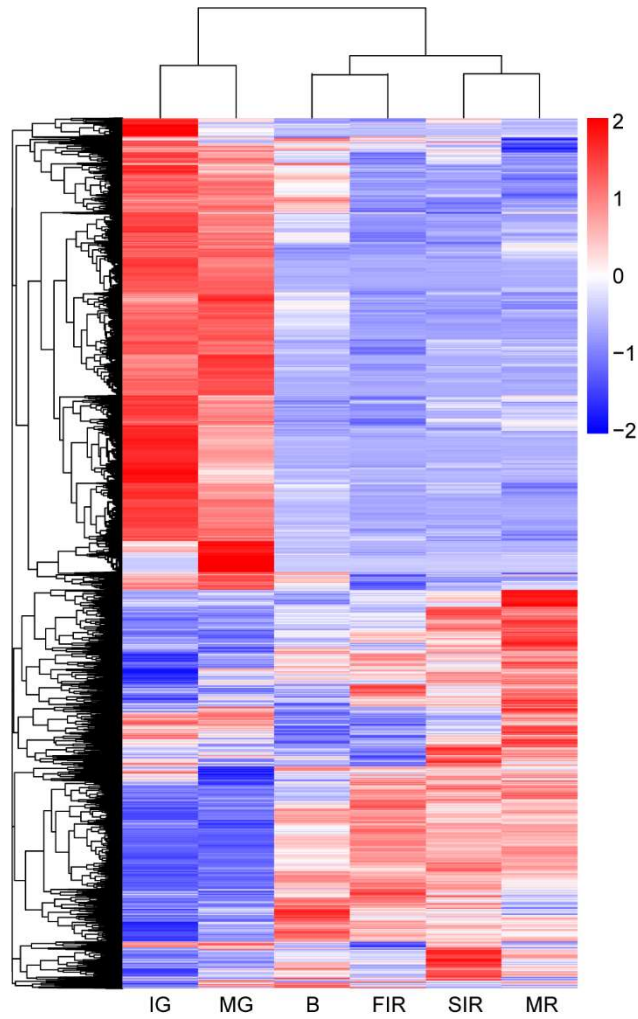

**Figure S1.** Cluster analysis of differentially expressed genes (DEGs) among chili pepper fruit ripening stages. Abbreviations for six ripening stages are: IG, immature green; MG, mature green; B, breaker; FIR, first immature red; SIR, second immature red; and MR, mature red. Logarithms of the reads per kilo bases per million reads (RPKM) value of each differentially expressed gene (plus 0.1) were calculated for hierarchical cluster analysis. Color bar indicates Z-score after normalization.

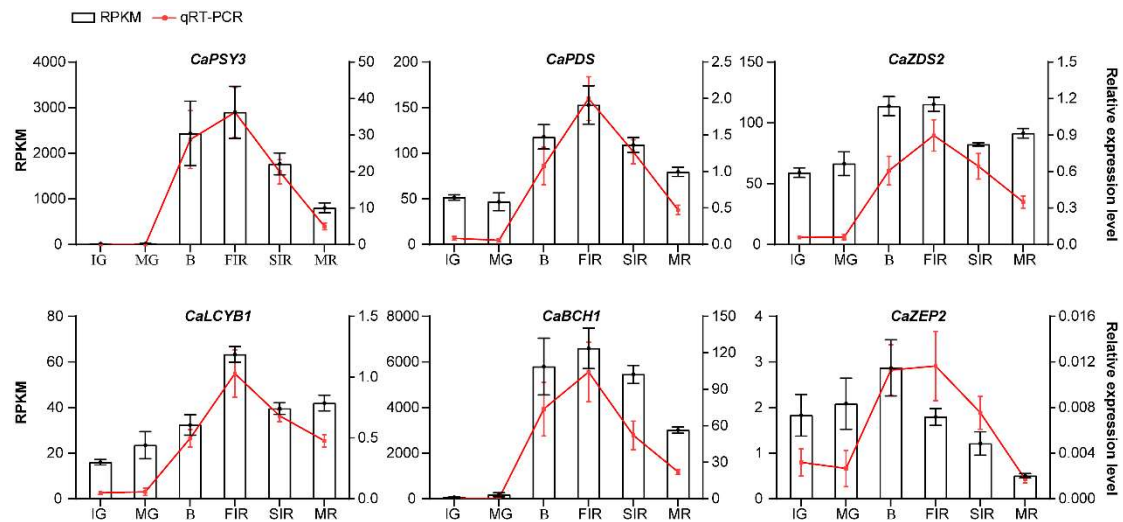

**Figure S2.** Transcript abundance of selected carotenoid biosynthesis genes in chili pepper fruits at different ripening stages. Transcript abundance of each gene determined by RNA-seq is presented as reads per kilo bases per million reads (RPKM), and by qRT-PCR is normalized against the expression level of  $\beta$ -tubulin. Different ripening stages are: IG, immature green; MG, mature green; B, breaker; FIR, first immature red; SIR, second immature red; and MR, mature red. Abbreviations for selected chili pepper (*Capsicum annuum* L., Ca) genes are: PSY, phytoene synthase; PDS, phytoene desaturase; ZDS,  $\zeta$ -carotene desaturase; LCYB, lycopene  $\beta$ -cyclase; BCH,  $\beta$ -carotene hydroxylase; and ZEP, zeaxanthin epoxidase. Data represents means  $\pm$  SEM ( $n = 3$ ).

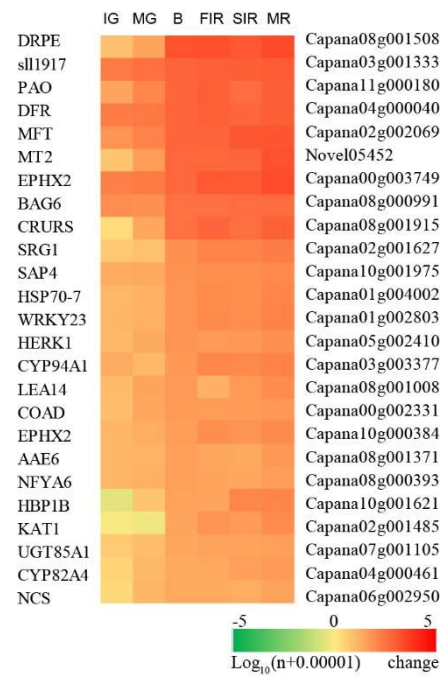

**Figure S3.** Transcript abundance of genes highly associated with  $\beta$ -carotene content in ripening fruits. Logarithms of the reads per kilo bases per million reads (RPKM) value of each gene (plus 0.0001) are presented. The full name for each gene can be found in Table 1.

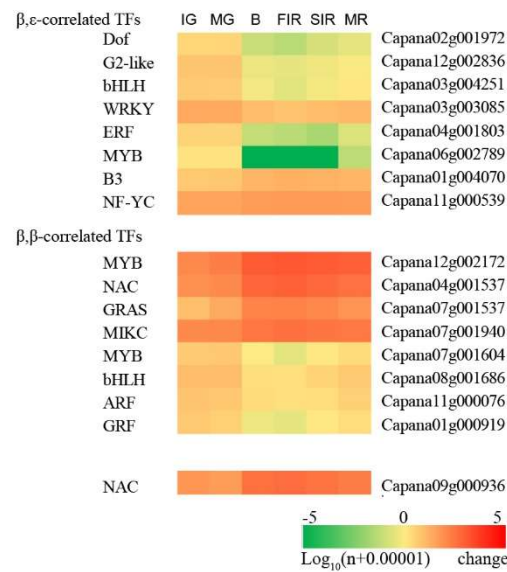

**Figure S4.** Transcript abundance of transcription factors co-expressed with carotenoid biosynthetic genes in chili pepper fruits. Logarithms of the reads per kilo bases per million reads (RPKM) value of each gene (plus 0.0001) are presented. The annotations for each gene are as follows: Dof, Dof zinc finger protein PBF; G2-like, transcription repressor KAN1; bHLH, transcription factor bHLH128; WRKY, probable WRKY transcription factor 20; ERF, ethylene-responsive transcription factor ERF021; MYB (Capana06g002789), transcription factor MYB59; B3, B3 domain-containing protein REM13; NF-YC, Dr1-associated corepressor; MYB (Capana12g002172), transcription factor MYB1R1; NAC (Capana04g001537), NAC domain-containing protein 2; GRAS, Scarecrow-like protein 32; MADS, floral homeotic protein AGAMOUS; MYB (Capana07g001604), Myb-related protein Myb4; bHLH (Capana08g001686), transcription factor PIF3; ARF, auxin response factor 18; GRF, growth-regulating factor; and NAC (Capana09g000936), NAC domain-containing protein.

**Table S1.** Primers used in this study.

| Accession number | Name                | Sequence               |
|------------------|---------------------|------------------------|
| Capana04g000187  | $\beta$ -tubulin-qF | GAGGGTGAGTGAGCAGTTC    |
|                  | $\beta$ -tubulin-qR | CTTCATCGTCATCTGCTGTC   |
| Capana04g002519  | CaPSY3-qF           | CTTGTGAGTAGTTGGGTTGGCA |
|                  | CaPSY3-qR           | GCTTCGGTTACTGATGTTGTTG |
| Capana03g000054  | CaPDS-qF            | TTGGAGGCTGCATTCTTATC   |
|                  | CaPDS-qR            | CTCCAGCAGTATTGGTTTGT   |
| Capana08g001316  | CaZDS2-QF           | AAATGGTCCAACGGGATTC    |
|                  | CaZDS2-QR           | GCAAGTCCAGCTCCAATAATA  |
| Capana05g000023  | CaLCYB1-qF          | GAAGTCATTCTGGGTGATGAG  |
|                  | CaLCYB1-qR          | CTTGTAGCCGGTAAGTCAAG   |
| Capana03g002170  | CaBCH1-QF           | CCTCCTTGACTATGGTTTCTTC |
|                  | CaBCH1-QR           | CATTAGCTACAGGTCCAACAG  |
| Capana06g001608  | CaZEP2-QF           | GCAGTATTGTGCTGGTTGGC   |
|                  | CaZEP2-QR           | GCTTTGAACGCTTCCTCGAC   |

**Table S2.** Statistical analysis of pigment contents in ripening chili pepper fruits.

| Pigments        | Comparisons <sup>1</sup> | Significance <sup>2</sup> | Adjusted <i>P</i> Value | Fold change (log <sub>2</sub> ) <sup>3</sup> |
|-----------------|--------------------------|---------------------------|-------------------------|----------------------------------------------|
| β-Carotene      | IG vs. MG                | ns                        | 0.7801                  | 0.5940                                       |
|                 | IG vs. B                 | ***                       | 0.0006                  | 1.7564                                       |
|                 | IG vs. FIR               | **                        | 0.0016                  | 1.6463                                       |
|                 | IG vs. SIR               | ***                       | 0.0003                  | 1.8312                                       |
|                 | IG vs. MR                | ****                      | <0.0001                 | 2.9489                                       |
| β-Cryptoxanthin | IG vs. MG                | ns                        | >0.9999                 | 0.0000                                       |
|                 | IG vs. B                 | **                        | 0.0013                  | 8.1115                                       |
|                 | IG vs. FIR               | ****                      | <0.0001                 | 9.3553                                       |
|                 | IG vs. SIR               | ****                      | <0.0001                 | 9.5063                                       |
|                 | IG vs. MR                | ****                      | <0.0001                 | 9.6841                                       |
| Zeaxanthin      | IG vs. MG                | ns                        | >0.9999                 | 4.5521                                       |
|                 | IG vs. B                 | ***                       | 0.0001                  | 10.7897                                      |
|                 | IG vs. FIR               | ****                      | <0.0001                 | 11.3658                                      |
|                 | IG vs. SIR               | ****                      | <0.0001                 | 11.3874                                      |
|                 | IG vs. MR                | ****                      | <0.0001                 | 11.8159                                      |
| Antheraxanthin  | IG vs. MG                | ns                        | 0.9982                  | 5.7337                                       |
|                 | IG vs. B                 | ****                      | <0.0001                 | 10.1470                                      |
|                 | IG vs. FIR               | ****                      | <0.0001                 | 10.8273                                      |
|                 | IG vs. SIR               | ****                      | <0.0001                 | 10.8676                                      |
|                 | IG vs. MR                | ****                      | <0.0001                 | 10.9353                                      |
| Violaxanthin    | IG vs. MG                | ns                        | 0.9942                  | 0.2662                                       |
|                 | IG vs. B                 | ****                      | <0.0001                 | 1.9740                                       |
|                 | IG vs. FIR               | ****                      | <0.0001                 | 1.9910                                       |
|                 | IG vs. SIR               | ****                      | <0.0001                 | 2.5025                                       |
|                 | IG vs. MR                | ****                      | <0.0001                 | 2.4546                                       |
| Neoxanthin      | IG vs. MG                | ns                        | 0.0848                  | 0.6591                                       |
|                 | IG vs. B                 | ****                      | <0.0001                 | 1.4565                                       |
|                 | IG vs. FIR               | ns                        | 0.7879                  | -0.3987                                      |
|                 | IG vs. SIR               | ns                        | 0.1099                  | -1.1451                                      |
|                 | IG vs. MR                | ns                        | >0.9999                 | -0.0602                                      |
| Capsanthin      | IG vs. MG                | ns                        | >0.9999                 | 0.0000                                       |
|                 | IG vs. B                 | *                         | 0.0205                  | 11.3709                                      |
|                 | IG vs. FIR               | ****                      | <0.0001                 | 12.6744                                      |
|                 | IG vs. SIR               | ****                      | <0.0001                 | 13.0288                                      |
|                 | IG vs. MR                | ****                      | <0.0001                 | 13.9654                                      |
| Capsorubin      | IG vs. MG                | ns                        | >0.9999                 | 0.0000                                       |
|                 | IG vs. B                 | ns                        | >0.9999                 | 0.0000                                       |
|                 | IG vs. FIR               | ns                        | 0.1374                  | 6.5317                                       |
|                 | IG vs. SIR               | ***                       | 0.0006                  | 7.7201                                       |
|                 | IG vs. MR                | ****                      | <0.0001                 | 9.7847                                       |
| Lutein          | IG vs. MG                | **                        | 0.0021                  | 0.6515                                       |
|                 | IG vs. B                 | *                         | 0.0199                  | -0.7820                                      |
|                 | IG vs. FIR               | ****                      | <0.0001                 | -4.4709                                      |
|                 | IG vs. SIR               | ****                      | <0.0001                 | -10.3772                                     |
|                 | IG vs. MR                | ****                      | <0.0001                 | -10.3772                                     |

|               |            |      |         |          |
|---------------|------------|------|---------|----------|
| Chlorophyll a | IG vs. MG  | **   | 0.0024  | 0.6932   |
|               | IG vs. B   | ns   | 0.7793  | -0.2346  |
|               | IG vs. FIR | **** | <0.0001 | -13.4594 |
|               | IG vs. SIR | **** | <0.0001 | -13.4594 |
|               | IG vs. MR  | **** | <0.0001 | -13.4594 |
| Chlorophyll b | IG vs. MG  | **   | 0.0011  | 0.7103   |
|               | IG vs. B   | ns   | 0.5063  | 0.2557   |
|               | IG vs. FIR | **** | <0.0001 | -12.4162 |
|               | IG vs. SIR | **** | <0.0001 | -12.4162 |
|               | IG vs. MR  | **** | <0.0001 | -12.4162 |

<sup>1</sup> The statistical analyses were performed by one way ANOVA and Tukey's multiple comparisons test. <sup>2</sup>*P* value thresholds for different significance levels were 0.05, 0.005, 0.001, and 0.0001, respectively; ns, not significant. <sup>3</sup>Fold changes were calculated with logarithms of the relative pigment contents from different stages plus 0.01 versus IG stage plus 0.01.

**Table S3.** RNA-seq data quality information.

| Sample name | Raw reads | Clean reads | Clean bases | Error rate (%) | Phred-scaled quality |         | GC content (%) |
|-------------|-----------|-------------|-------------|----------------|----------------------|---------|----------------|
|             |           |             |             |                | Q20 (%)              | Q30 (%) |                |
| IG1_1       | 41429322  | 40522866    | 6.07G       | 0.02           | 98.23                | 95.12   | 42.06          |
| IG1_2       | 41429322  | 40522866    | 6.07G       | 0.04           | 93.81                | 86.01   | 42.32          |
| IG2_1       | 38643699  | 37980229    | 5.69G       | 0.02           | 98.16                | 94.96   | 42.40          |
| IG2_2       | 38643699  | 37980229    | 5.69G       | 0.04           | 93.26                | 84.98   | 42.69          |
| IG3_1       | 38200860  | 37581543    | 5.63G       | 0.02           | 98.20                | 95.02   | 42.38          |
| IG3_2       | 38200860  | 37581543    | 5.63G       | 0.04           | 92.86                | 84.21   | 42.71          |
| MG1_1       | 41212934  | 40517654    | 6.07G       | 0.02           | 98.16                | 95.00   | 41.95          |
| MG1_2       | 41212934  | 40517654    | 6.07G       | 0.04           | 93.67                | 85.72   | 42.23          |
| MG2_1       | 37307253  | 36738204    | 5.50G       | 0.02           | 98.26                | 95.16   | 42.29          |
| MG2_2       | 37307253  | 36738204    | 5.50G       | 0.04           | 93.42                | 85.28   | 42.57          |
| MG3_1       | 35755956  | 35161788    | 5.27G       | 0.02           | 98.21                | 95.06   | 42.30          |
| MG3_2       | 35755956  | 35161788    | 5.27G       | 0.04           | 93.92                | 86.15   | 42.57          |
| B1_1        | 36588097  | 35935285    | 5.38G       | 0.02           | 98.24                | 95.13   | 41.86          |
| B1_2        | 36588097  | 35935285    | 5.38G       | 0.04           | 94.30                | 86.90   | 42.10          |
| B2_1        | 37535890  | 36689474    | 5.50G       | 0.02           | 98.13                | 94.98   | 41.42          |
| B2_2        | 37535890  | 36689474    | 5.50G       | 0.03           | 94.50                | 87.38   | 41.65          |
| B3_1        | 35414634  | 34863087    | 5.22G       | 0.02           | 98.27                | 95.19   | 41.61          |
| B3_2        | 35414634  | 34863087    | 5.22G       | 0.04           | 94.29                | 86.83   | 41.84          |
| FIR1_1      | 34968716  | 33692856    | 5.05G       | 0.02           | 98.21                | 95.07   | 41.52          |
| FIR1_2      | 34968716  | 33692856    | 5.05G       | 0.04           | 94.28                | 86.83   | 41.73          |
| FIR2_1      | 37363783  | 36763467    | 5.51G       | 0.02           | 98.22                | 95.08   | 41.36          |
| FIR2_2      | 37363783  | 36763467    | 5.51G       | 0.04           | 92.96                | 84.31   | 41.68          |
| FIR3_1      | 37569673  | 36962379    | 5.54G       | 0.02           | 98.24                | 95.13   | 41.55          |
| FIR3_2      | 37569673  | 36962379    | 5.54G       | 0.04           | 93.67                | 85.62   | 41.83          |
| SIR1_1      | 40670208  | 39949755    | 5.99G       | 0.02           | 98.21                | 95.01   | 41.67          |
| SIR1_2      | 40670208  | 39949755    | 5.99G       | 0.03           | 94.78                | 87.80   | 41.77          |
| SIR2_1      | 39838323  | 39075085    | 5.86G       | 0.02           | 98.08                | 94.73   | 41.72          |
| SIR2_2      | 39838323  | 39075085    | 5.86G       | 0.04           | 93.31                | 84.91   | 41.89          |
| SIR3_1      | 35972833  | 35308766    | 5.30G       | 0.02           | 98.20                | 94.99   | 41.59          |
| SIR3_2      | 35972833  | 35308766    | 5.30G       | 0.04           | 93.60                | 85.65   | 41.76          |
| MR1_1       | 38020003  | 37280468    | 5.59G       | 0.02           | 98.23                | 95.07   | 41.46          |
| MR1_2       | 38020003  | 37280468    | 5.59G       | 0.03           | 94.44                | 87.09   | 41.57          |
| MR2_1       | 43038670  | 42302749    | 6.35G       | 0.02           | 98.21                | 95.02   | 41.66          |
| MR2_2       | 43038670  | 42302749    | 6.35G       | 0.04           | 94.24                | 86.69   | 41.79          |
| MR3_1       | 37559601  | 36826952    | 5.52G       | 0.02           | 98.18                | 94.95   | 41.80          |
| MR3_2       | 37559601  | 36826952    | 5.52G       | 0.04           | 93.50                | 85.34   | 41.95          |



**Table S4.** Alignment of the RNA-seq reads and the reference genome.

| Sample name | Total reads | Total mapped      | Multiple mapped | Uniquely mapped   | Read-1            | Read-2            | Reads map to '+'  | Reads map to '-'  | Non-splice reads  | Splice reads      |
|-------------|-------------|-------------------|-----------------|-------------------|-------------------|-------------------|-------------------|-------------------|-------------------|-------------------|
| IG1         | 81045732    | 71072830 (87.69%) | 2674445 (3.3%)  | 68398385 (84.39%) | 35312214 (43.57%) | 33086171 (40.82%) | 34221327 (42.22%) | 34177058 (42.17%) | 46434742 (57.29%) | 21963643 (27.1%)  |
| IG2         | 75960458    | 65883045 (86.73%) | 2091759 (2.75%) | 63791286 (83.98%) | 33089582 (43.56%) | 30701704 (40.42%) | 31899055 (41.99%) | 31892231 (41.99%) | 43557120 (57.34%) | 20234166 (26.64%) |
| IG3         | 75163086    | 65400710 (87.01%) | 2188915 (2.91%) | 63211795 (84.1%)  | 32871030 (43.73%) | 30340765 (40.37%) | 31610997 (42.06%) | 31600798 (42.04%) | 42893684 (57.07%) | 20318111 (27.03%) |
| MG1         | 81035308    | 71077097 (87.71%) | 2563442 (3.16%) | 68513655 (84.55%) | 35376511 (43.66%) | 33137144 (40.89%) | 34265923 (42.29%) | 34247732 (42.26%) | 47785706 (58.97%) | 20727949 (25.58%) |
| MG2         | 73476408    | 64199550 (87.37%) | 1944838 (2.65%) | 62254712 (84.73%) | 32232356 (43.87%) | 30022356 (40.86%) | 31055290 (42.27%) | 31199422 (42.46%) | 42193962 (57.43%) | 20060750 (27.3%)  |
| MG3         | 70323576    | 61830262 (87.92%) | 2299568 (3.27%) | 59530694 (84.65%) | 30686810 (43.64%) | 28843884 (41.02%) | 29775234 (42.34%) | 29755460 (42.31%) | 40157651 (57.1%)  | 19373043 (27.55%) |
| B1          | 71870570    | 63466064 (88.31%) | 1843815 (2.57%) | 61622249 (85.74%) | 31685881 (44.09%) | 29936368 (41.65%) | 30680763 (42.69%) | 30941486 (43.05%) | 41693906 (58.01%) | 19928343 (27.73%) |
| B2          | 73378948    | 64759924 (88.25%) | 2069770 (2.82%) | 62690154 (85.43%) | 32167426 (43.84%) | 30522728 (41.6%)  | 31256571 (42.6%)  | 31433583 (42.84%) | 44762370 (61%)    | 17927784 (24.43%) |
| B3          | 69726174    | 61846454 (88.7%)  | 1855616 (2.66%) | 59990838 (86.04%) | 30853348 (44.25%) | 29137490 (41.79%) | 29920979 (42.91%) | 30069859 (43.13%) | 40126444 (57.55%) | 19864394 (28.49%) |
| FIR1        | 67385712    | 53208533 (78.96%) | 1547050 (2.3%)  | 51661483 (76.67%) | 26593435 (39.46%) | 25068048 (37.2%)  | 25729076 (38.18%) | 25932407 (38.48%) | 34682917 (51.47%) | 16978566 (25.2%)  |
| FIR2        | 73526934    | 64409262 (87.6%)  | 1789097 (2.43%) | 62620165 (85.17%) | 32509732 (44.21%) | 30110433 (40.95%) | 31188328 (42.42%) | 31431837 (42.75%) | 42106836 (57.27%) | 20513329 (27.9%)  |
| FIR3        | 73924758    | 64669947 (87.48%) | 1908417 (2.58%) | 62761530 (84.9%)  | 32421100 (43.86%) | 30340430 (41.04%) | 31244790 (42.27%) | 31516740 (42.63%) | 43069425 (58.26%) | 19692105 (26.64%) |
| SIR1        | 79899510    | 70857393 (88.68%) | 2239174 (2.8%)  | 68618219 (85.88%) | 35084645 (43.91%) | 33533574 (41.97%) | 34164021 (42.76%) | 34454198 (43.12%) | 46920729 (58.72%) | 21697490 (27.16%) |
| SIR2        | 78150170    | 68719642 (87.93%) | 2203834 (2.82%) | 66515808 (85.11%) | 34329055 (43.93%) | 32186753 (41.19%) | 33102530 (42.36%) | 33413278 (42.76%) | 46653355 (59.7%)  | 19862453 (25.42%) |
| SIR3        | 70617532    | 61921843 (87.69%) | 1946772 (2.76%) | 59975071 (84.93%) | 30930402 (43.8%)  | 29044669 (41.13%) | 29868722 (42.3%)  | 30106349 (42.63%) | 41682089 (59.03%) | 18292982 (25.9%)  |
| MR1         | 74560936    | 65839810 (88.3%)  | 2119865 (2.84%) | 63719945 (85.46%) | 32653979 (43.8%)  | 31065966 (41.67%) | 31771274 (42.61%) | 31948671 (42.85%) | 43786017 (58.73%) | 19933928 (26.74%) |
| MR2         | 84605498    | 74932528 (88.57%) | 2597500 (3.07%) | 72335028 (85.5%)  | 37104437 (43.86%) | 35230591 (41.64%) | 36076273 (42.64%) | 36258755 (42.86%) | 50438546 (59.62%) | 21896482 (25.88%) |
| MR3         | 73653904    | 64745079 (87.9%)  | 2252133 (3.06%) | 62492946 (84.85%) | 32229107 (43.76%) | 30263839 (41.09%) | 31182021 (42.34%) | 31310925 (42.51%) | 42732408 (58.02%) | 19760538 (26.83%) |

**Table S5.** Genes for carotenoid biosynthesis enzymes identified from the chili pepper *Zunla-1* genome.

| Accession number | Name                                                |
|------------------|-----------------------------------------------------|
| Capana00g002450  | geranylgeranyl diphosphate synthase 1 (GGPPS1)      |
| Capana00g002451  | geranylgeranyl diphosphate synthase 2 (GGPPS2)      |
| Capana00g002452  | geranylgeranyl diphosphate synthase 3 (GGPPS3)      |
| Capana03g002322  | geranylgeranyl diphosphate synthase 4 (GGPPS4)      |
| Capana04g000412  | geranylgeranyl diphosphate synthase 5 (GGPPS5)      |
| Capana05g000800  | geranylgeranyl diphosphate synthase 6 (GGPPS6)      |
| Capana00g004199  | GGPPS small subunit, type I (SSUI)                  |
| Capana09g002331  | GGPPS small subunit, type II (SSUII)                |
| Capana01g001510  | phytoene synthase 1 (PSY1)                          |
| Capana02g002284  | phytoene synthase 2 (PSY2)                          |
| Capana04g002519  | phytoene synthase 3 (PSY3)                          |
| Capana10g000838  | phytoene synthase 4 (PSY4)                          |
| Capana03g000054  | 15- <i>cis</i> -phytoene desaturase (PDS)           |
| Capana12g000229  | 15- <i>cis</i> - $\zeta$ -carotene isomerase (ZISO) |
| Capana08g001314  | $\zeta$ -carotene desaturase 1 (ZDS1)               |
| Capana08g001316  | $\zeta$ -carotene desaturase 2 (ZDS2)               |
| Capana00g004805  | carotene isomerase 1 (CRTISO1)                      |
| Capana11g002179  | carotene isomerase 2 (CRTISO2)                      |
| Capana05g000023  | lycopene $\beta$ -cyclase 1 (LCYB1)                 |
| Capana10g002320  | lycopene $\beta$ -cyclase 2 (LCYB2)                 |
| Capana00g002014  | lycopene $\epsilon$ -cyclase 1 (LCYE1)              |
| Capana07g001071  | lycopene $\epsilon$ -cyclase 2 (LCYE2)              |
| Capana09g000177  | lycopene $\epsilon$ -cyclase 3 (LCYE3)              |
| Capana12g001558  | lycopene $\epsilon$ -cyclase 4 (LCYE4)              |
| Capana12g001560  | lycopene $\epsilon$ -cyclase 5 (LCYE5)              |
| Capana12g001589  | lycopene $\epsilon$ -cyclase 6 (LCYE6)              |
| Capana01g002976  | carotene $\epsilon$ -hydroxylase 1 (CYP97C1)        |
| Capana05g002138  | carotene $\epsilon$ -hydroxylase 2 (CYP97C2)        |
| Capana06g001091  | carotene $\epsilon$ -hydroxylase 3 (CYP97C3)        |
| Capana10g001912  | carotene $\epsilon$ -hydroxylase 4 (CYP97C3)        |
| Capana12g001743  | carotene $\beta$ -hydroxylase (CYP97A)              |
| Capana03g002170  | $\beta$ -carotene hydroxylase 1 (BCH1)              |
| Capana06g002492  | $\beta$ -carotene hydroxylase 2 (BCH2)              |
| Capana02g003105  | zeaxanthin epoxidase 1 (ZEP1)                       |
| Capana06g001608  | zeaxanthin epoxidase 2 (ZEP2)                       |
| Capana12g001449  | violaxanthin de-epoxidase 1 (VDE1)                  |
| Capana12g001844  | violaxanthin de-epoxidase 2 (VDE2)                  |
| Capana06g000615  | capsanthin/capsorubin synthase (CCS)                |

Gene sequences are accessible through the *Zunla-1* genome (<https://solgenomics.net/tools/blast/>, accessed on 1 January 2019).
